# Supplementary material for: Genotypic variations in GST genes reveal a regulatory role in the accumulation of caffeoylquinic acids in leafy sweet potato
Source: Research Square preprint supplement (doi:10.21203/rs.3.rs-1213676/v1), 2022-02-21
Supplement: Supplementary file 1 [file 60697d386242c1e0fa7556f1.xlsx]

## Sheet: IbGST primer sequences
Additional file 2: Table S2. Primer sequences of IbGST genes
Locus ID	Gene name	Primer name	qPCR primer sequences (5'-3')	Cloning primer sequences (5'-3')	Overexpression vector construction primer sequences (5'-3')
Actin	β-Actin	F	AGCAGCATGAAGATTAAGGTTGTAGCAC	-	-	-
		R	TGGAAAATTAGAAGCACTTCCTGTGAAC	-	-	-
itb01g35330	IbGSTTCHQD	F	GACTCGCCGCCATATTCCAA	ATGAGGAGGCTAAGTGGACTC	Kpn1	GGGGTACCATGAGGAGGCTAAGTGGACTC
		R	AGCATTGTACCGGAGACGAC	TTATGCCTGAACTTTTGAAGGTT	BamHI	CGGGATCCTATGCCTGAACTTTTGAAGGTT
itb09g30700	IbGSTT	F	CTGTTGGCTTCCCTTGAT	ATGACGCTCACAGTGTATGTTGA	BamHI	CGGGATCCATGACGCTCACAGTGTATGTTGA
		R	TGGGCTTAGTATTCTGTCG	TTACATCTTTGAATGCAAGTTCGA	XbaI	GCTCTAGATACATCTTTGAATGCAAGTTCGA
